# Supplementary material
Source: PubMed Central journal article supplement (PMC10524687)
Supplement: NIHMS1904917-supplement-1.pdf [file NIHMS1904917-supplement-1.pdf]

**Supplementary Material**

Figures S1-S2

Figure S1

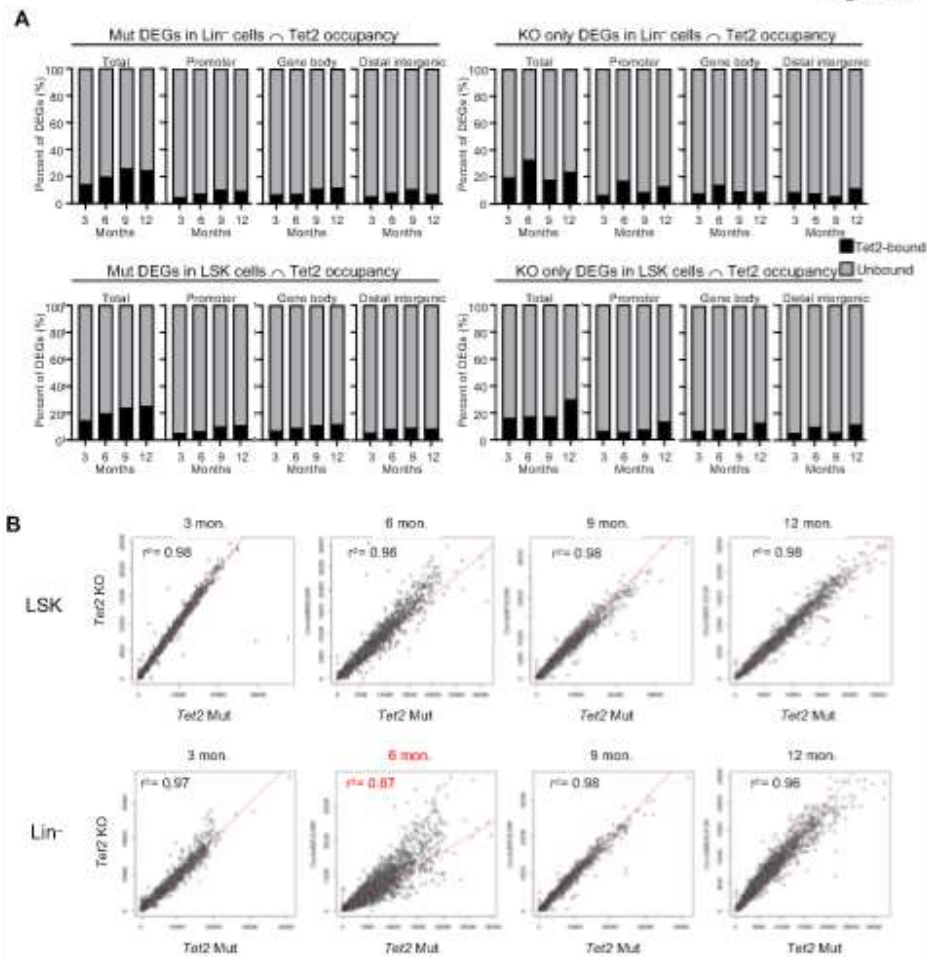

**Figure S1: Transcriptomic characterization of *Tet2* Mut and KO LSK and *Lin*<sup>-</sup> cells.**

- A. Integration of *Tet2* occupancy in AML cells with gene expression data from *Tet2* Mut and KO LSK and *Lin*<sup>-</sup> cells across time points (*Tet2* ChIP-seq data from Rasmussen et al., 2019). Percentages of *Tet2*-bound DEGs across genomic regions and time points are shown.
- B. Transcriptome-wide correlation analysis between *Tet2* Mut and KO LSK and *Lin*<sup>-</sup> cells. Note that gene expression is most divergent between genotypes at 6 months in *Lin*<sup>-</sup> cells (lowest  $r^2$  value).

Figure S2

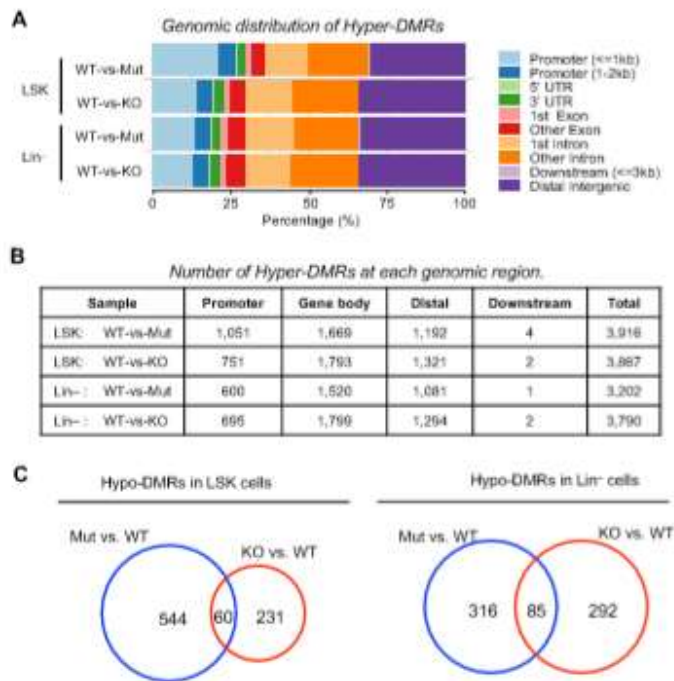Figure S2: WGBS of Tet2 Mut and KO LSK and Lin<sup>-</sup> cells at 3 months of age

- Genomic annotation of hyper-DMRs found in Tet2 Mut and KO LSK and Lin<sup>-</sup> cells.
- Number of hyper-DMRs at the indicated genomic regions.
- Overlap of hypo-DMRs in Mut and KO LSK and Lin<sup>-</sup> cells.
